# Supplementary material
Source: Royal Society of Chemistry journal article supplement (doi:10.1039/d6tb00507a)
Supplement: d6tb00507a1.pdf [file d6tb00507a1.pdf]

## **Triphenylamine-Boronic-Acid-based Theragnostic Biomaterial for Diabetes with Concurrent Fluorescence Sensing of Glucose and Microviscosity**

M. M. Sreejaya,<sup>a</sup> Sayan Paul,<sup>b</sup> Pragya Trivedi,<sup>c,d</sup> Fathima Puthiya Madathummal Sana,<sup>c</sup> Vaishnavi Mekkeparambath,<sup>a</sup> Ashwin Nair,<sup>a</sup> Malavika G,<sup>a</sup> Angel Mariyam Biju,<sup>a</sup> Kalyani P. M,<sup>a</sup> Avijit Jana,<sup>c,d\*</sup> Anakuthil Anoop,<sup>e\*</sup> Moumita Gangopadhyay<sup>a\*</sup>

<sup>a</sup>Department of Chemistry, Amrita Vishwa Vidyapeetham, Amritapuri, Kollam, Kerala 690525, India, E-mail: [moumita@am.amrita.edu](mailto:moumita@am.amrita.edu)

<sup>b</sup>Department of Chemistry, Indian Institute of Technology Kharagpur, Kharagpur 721302, India

<sup>c</sup>Department of Natural Products and Medicinal Chemistry, CSIR-Indian Institute of Chemical Technology, Hyderabad 500007, India. E-mail: [avijit.iict@csir.res.in](mailto:avijit.iict@csir.res.in)

<sup>d</sup>Academy of Scientific and Innovative Research (AcSIR), Ghaziabad 201002, Uttar Pradesh, India

<sup>e</sup>Kerala University of Digital Sciences, Innovation and Technology (Digital University Kerala), Thiruvananthapuram, Kerala-695317, India. E-mail: [anoop.a@duk.ac.in](mailto:anoop.a@duk.ac.in)

## Table of Content

|                                                                                                                                                                                                                                                                               |    |
|-------------------------------------------------------------------------------------------------------------------------------------------------------------------------------------------------------------------------------------------------------------------------------|----|
| Figure S1. <sup>1</sup> H NMR (400 MHz, 298 K, CDCl <sub>3</sub> ) spectrum of 2                                                                                                                                                                                              | 5  |
| Figure S2. <sup>13</sup> C NMR (100 MHz, 298 K, CDCl <sub>3</sub> ) spectrum of 2                                                                                                                                                                                             | 5  |
| Figure S3. High-resolution mass spectrum of 2                                                                                                                                                                                                                                 | 6  |
| Figure S4. <sup>1</sup> H NMR (400 MHz, 298 K, CDCl <sub>3</sub> ) spectrum of 3a                                                                                                                                                                                             | 6  |
| Figure S5. <sup>13</sup> C NMR (100 MHz, 298 K, CDCl <sub>3</sub> ) spectrum of 3a                                                                                                                                                                                            | 7  |
| Figure S6. High-resolution mass spectrum of 3a                                                                                                                                                                                                                                | 7  |
| Figure S7. <sup>1</sup> H NMR (400 MHz, 298 K, CDCl <sub>3</sub> ) spectrum of 3b                                                                                                                                                                                             | 8  |
| Figure S8. <sup>13</sup> C NMR (100 MHz, 298 K, CDCl <sub>3</sub> ) spectrum of 3b                                                                                                                                                                                            | 8  |
| Figure S9. High-resolution mass spectrum of 3b                                                                                                                                                                                                                                | 9  |
| Figure S10. <sup>1</sup> H NMR (400 MHz, 298 K, CDCl <sub>3</sub> ) spectrum of 3c                                                                                                                                                                                            | 9  |
| Figure S11. <sup>13</sup> C NMR (100 MHz, 298 K, CDCl <sub>3</sub> ) spectrum of 3c                                                                                                                                                                                           | 10 |
| Figure S12. High-resolution mass spectrum of 3c                                                                                                                                                                                                                               | 10 |
| Figure S13. UV-Vis absorption spectra (a-c) of the compounds 3a, 3b, and 3c recorded at different pH levels (2–10). Sample concentration: (10 μM)                                                                                                                             | 11 |
| Figure S14 Stability studies of 3a, 3b, and 3c over physiological pH range.                                                                                                                                                                                                   | 11 |
| Figure S15. UV-Vis absorption spectra (a-f) and fluorescence emission spectra (g-l) for the titration of 3a with increasing concentrations of glucose (0 – 0.286 mM) in acetonitrile/PBS buffer at pH 2, 4, 6, 7, 8, and 10, respectively. Sample concentration: 10 μM        | 12 |
| Figure S16. UV-Vis absorption spectra (a-f) and fluorescence emission spectra (g-l) for the titration of 3b with increasing concentrations of glucose (0 – 0.286 mM) in acetonitrile/PBS buffer at pH 2, 4, 6, 7, 8, and 10, respectively. Sample concentration: 10 μM        | 13 |
| Figure S17. UV-Vis absorption spectra (a-f) and fluorescence emission spectra (g-l) for the titration of 3c with increasing concentrations of glucose (0 – 0.286 mM) in acetonitrile/PBS buffer at pH 2, 4, 6, 7, 8, and 10, respectively. Sample concentration: 10 μM        | 14 |
| Figure S18. UV-Vis absorption spectra (a-g) and fluorescence emission spectra (h-n) of the compound 3a in the presence of other competing saccharides (Fructose, Ribose, Mannose, Galactose, Maltose, Lactose, Sucrose). The sample solutions were maintained at 10 μM in 2:8 | 15 |

|                                                                                                                                                                                                                                                                                                                                                                                                                                                                                                                                                                                                                                                                                                                                                                                                                                                                                                                                                                                                                                                                                                                                                                                                               |    |  |
|---------------------------------------------------------------------------------------------------------------------------------------------------------------------------------------------------------------------------------------------------------------------------------------------------------------------------------------------------------------------------------------------------------------------------------------------------------------------------------------------------------------------------------------------------------------------------------------------------------------------------------------------------------------------------------------------------------------------------------------------------------------------------------------------------------------------------------------------------------------------------------------------------------------------------------------------------------------------------------------------------------------------------------------------------------------------------------------------------------------------------------------------------------------------------------------------------------------|----|--|
| ACN/PBS buffer ( pH 7).                                                                                                                                                                                                                                                                                                                                                                                                                                                                                                                                                                                                                                                                                                                                                                                                                                                                                                                                                                                                                                                                                                                                                                                       |    |  |
| Figure S19. UV-Vis absorption spectra (a-g) and fluorescence emission spectra (h-n) of the compound 3b in the presence of other competing saccharides (Fructose, Ribose, Mannose, Galactose, Maltose, Lactose, Sucrose). The sample solutions were maintained at 10 $\mu$ M in 2:8 ACN/PBS buffer ( pH ).                                                                                                                                                                                                                                                                                                                                                                                                                                                                                                                                                                                                                                                                                                                                                                                                                                                                                                     | 16 |  |
| Figure S20. UV-Vis absorption spectra (a-g) and fluorescence emission spectra (h-n) of the compound 3c in the presence of other competing saccharides (Fructose, Ribose, Mannose, Galactose, Maltose, Lactose, Sucrose). The sample solutions were maintained at 10 $\mu$ M in 2:8 ACN/PBS buffer ( pH ).                                                                                                                                                                                                                                                                                                                                                                                                                                                                                                                                                                                                                                                                                                                                                                                                                                                                                                     | 17 |  |
| Figure 21. (a) Relative fluorescence response $(F - F_0)/F_0$ of probes 3a, 3b, and 3c, respectively, in the presence of various metal ions. (b) Relative fluorescence response $(F - F_0)/F_0$ of probes 3a, 3b, and 3c, respectively, in the presence of biologically relevant anions, amino acids, and GSH. [Leu: L-Leucine, Gly: L-Glycine, Pro: L-Proline, and GSH: Glutathione]                                                                                                                                                                                                                                                                                                                                                                                                                                                                                                                                                                                                                                                                                                                                                                                                                         | 17 |  |
| Figure S22. UV-Vis absorption spectra (a-c) and fluorescence emission spectra (d-f) of the compounds 3a, 3b and 3c recorded at various time intervals from 0 to 60 minutes. Sample concentration: (10 $\mu$ M), solvent system: 2:8 ACN: PBS Buffer ( pH 7 )                                                                                                                                                                                                                                                                                                                                                                                                                                                                                                                                                                                                                                                                                                                                                                                                                                                                                                                                                  | 18 |  |
| Figure S23. UV-Vis absorption spectra (a-c) and fluorescence emission spectra (d-f) of the compounds 3a, 3b and 3c recorded at various temperatures ranging from 0 to 70 $^{\circ}$ C. Sample concentration: (10 $\mu$ M), solvent system: 2:8 ACN: PBS Buffer (pH 7).                                                                                                                                                                                                                                                                                                                                                                                                                                                                                                                                                                                                                                                                                                                                                                                                                                                                                                                                        | 18 |  |
| Figure S24. Absorbance spectra (a-c) of 3a, 3b, and 3c in solutions with varying viscosities (0.52–1.22 cP). Sample concentration: 10 $\mu$ M. Solvent: THF.                                                                                                                                                                                                                                                                                                                                                                                                                                                                                                                                                                                                                                                                                                                                                                                                                                                                                                                                                                                                                                                  | 19 |  |
| Figure S25. Fluorescence lifetime profile of 3c in the presence and absence of polyvinyl chloride (PVC).                                                                                                                                                                                                                                                                                                                                                                                                                                                                                                                                                                                                                                                                                                                                                                                                                                                                                                                                                                                                                                                                                                      | 19 |  |
| Figure S26. (a–c) Absorbance spectra and (d–f) fluorescence spectra of probes 3a, 3b, and 3c, respectively, in water–glycerol mixtures with varying glycerol content (0-100 %).                                                                                                                                                                                                                                                                                                                                                                                                                                                                                                                                                                                                                                                                                                                                                                                                                                                                                                                                                                                                                               | 20 |  |
| Figure S27 (a-f) Computed photophysical properties of boronate ester complexes of TPA-TBA probes with glucose using CPCM (2: 8 ACN/PBS)-TD-B3LYP-D4/def2-TZVP(-f)//B3LYP-D4/def2-SVP level of theory. The isosurfaces of the hole transition distribution (HTD) and the electron transition distribution (ETD) for the optically bright $S_0 \rightarrow S_1$ transition are shown in orange-red and dark cyan, respectively (isovalue = 0.001). Golden isosurfaces correspond to regions of hole-electron overlap. The hole-electron overlap ( $S_r$ ), exciton binding energy ( $E_{coul}$ ), overall estimate of the degree of spatial extension of HTD and ETD ( $H$ ), and separation degree of hole and electron in the charge-transfer (CT) direction ( $t$ ) are shown. The real-space analyses of the electronic excitation of the TPA-TBA-glucose complexes are shown as follows: (a, d) meta, (b, e) ortho, and (c, f) para. Hole-electron %contributions, %overlap indices, and apparent charge-transfer (CT) and local excitation (LE) % contributions are shown in the corresponding tables. Grey-dotted areas denote the boron centre containing fragments ( <i>frag-2</i> ) used for the IFCT | 20 |  |

|                                                                     |    |
|---------------------------------------------------------------------|----|
| calculation                                                         |    |
| Table S1. Binding constant of saccharides for 3a, 3b, 3c            | 21 |
| Table S2. Cartesian coordinates of the DFT-computed geometry for 3a | 21 |
| Table S3. Cartesian coordinates of the DFT-computed geometry for 3b | 23 |
| Table S4. Cartesian coordinates of the DFT-computed geometry for 3c | 25 |

## 1. Characterization using $^1\text{H}$ , $^{13}\text{C}$ , and HRMS

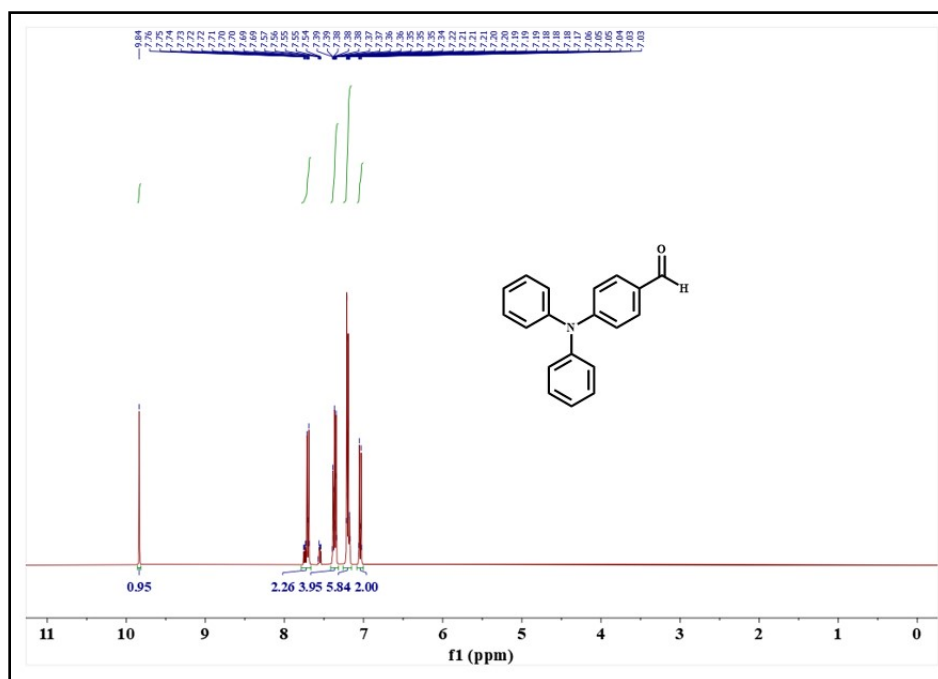

Figure S1.  $^1\text{H}$  NMR (400 MHz, 298 K,  $\text{CDCl}_3$ ) spectrum of 2

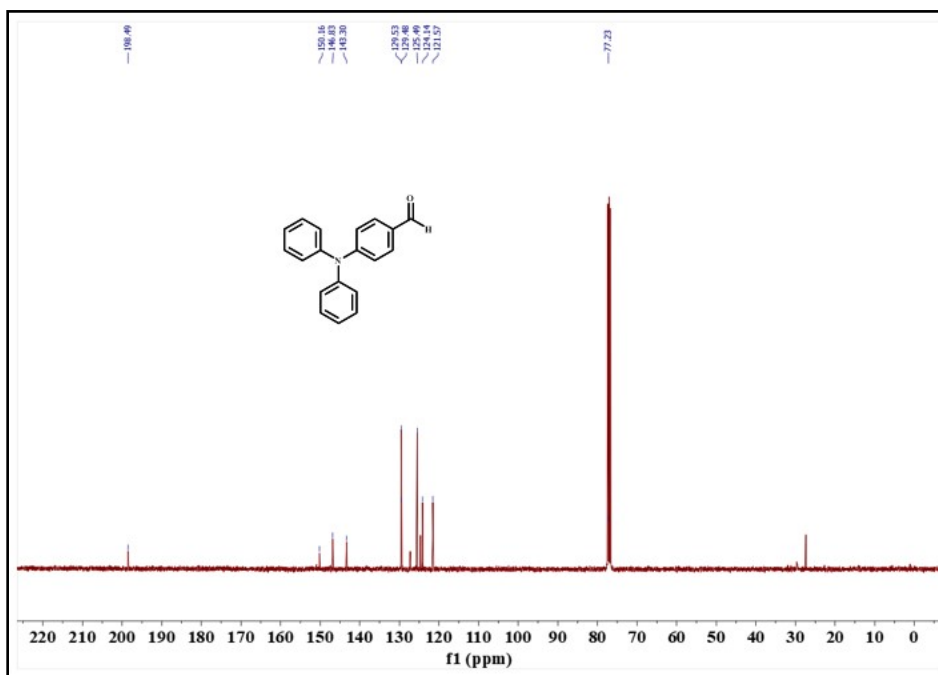

Figure S2.  $^{13}\text{C}$  NMR (100 MHz, 298 K,  $\text{CDCl}_3$ ) spectrum of 2

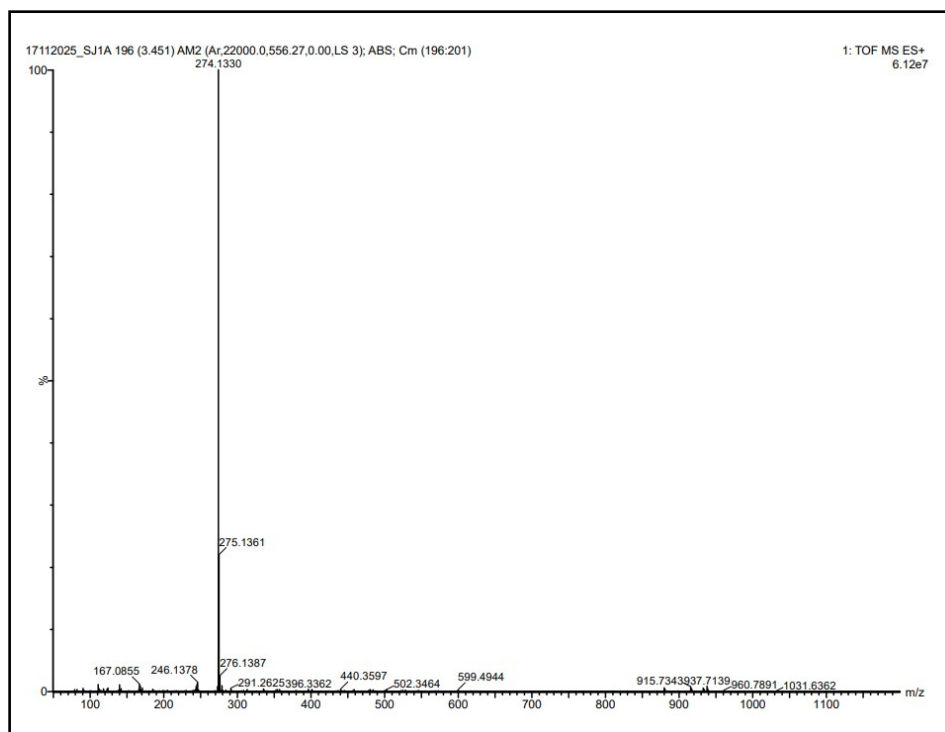

Figure S3. High-resolution mass spectrum of 2

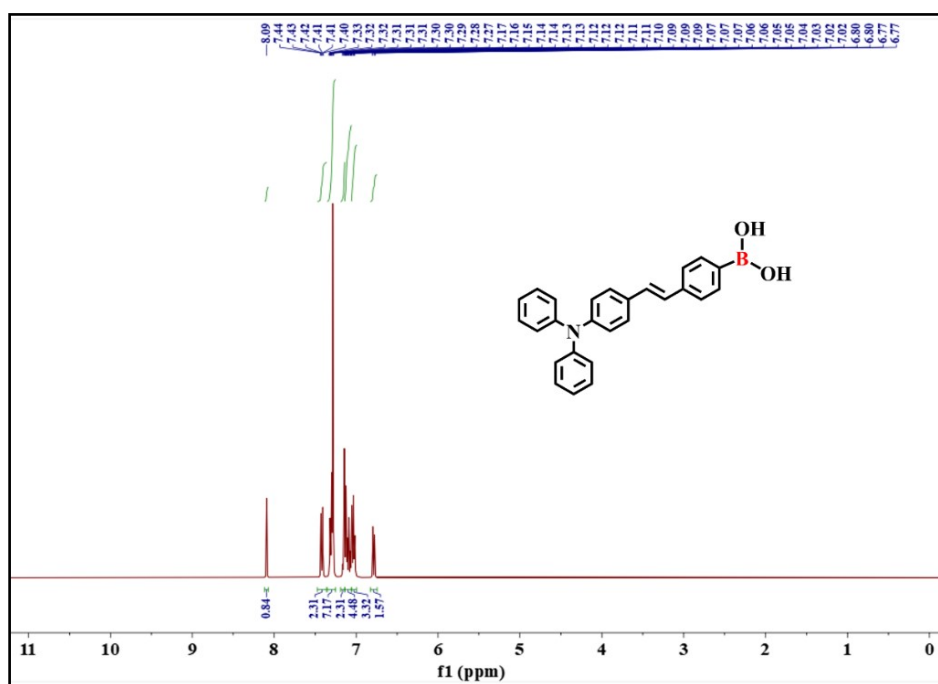

Figure S4.  $^1\text{H}$  NMR (400 MHz, 298 K,  $\text{CDCl}_3$ ) spectrum of 3a

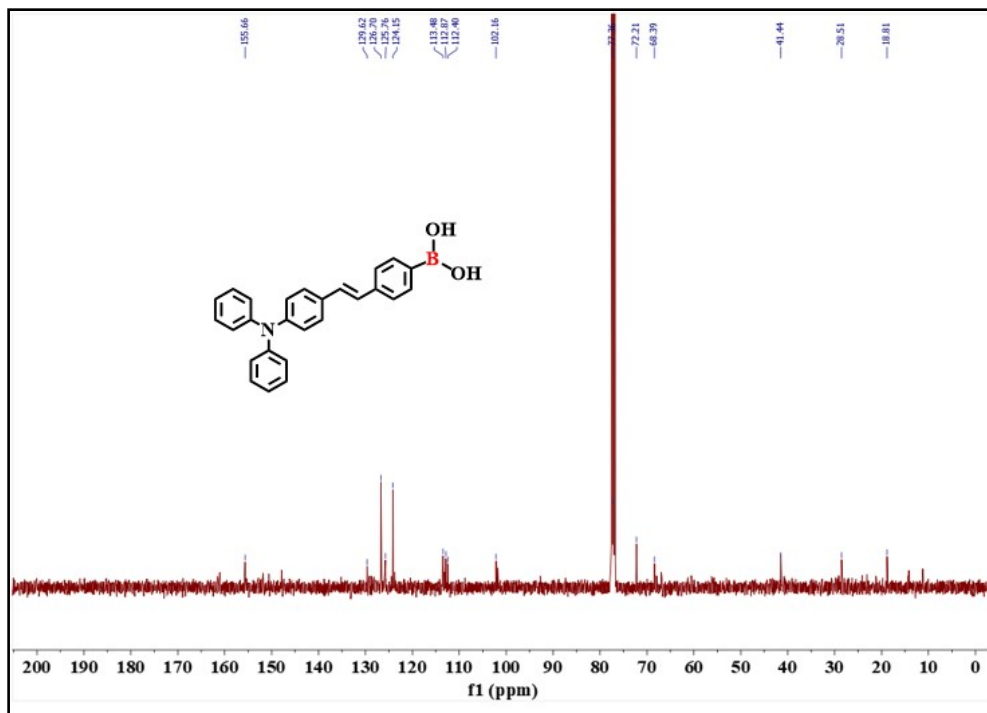

Figure S5. <sup>13</sup>C NMR (100 MHz, 298 K, CDCl<sub>3</sub>) spectrum of 3a

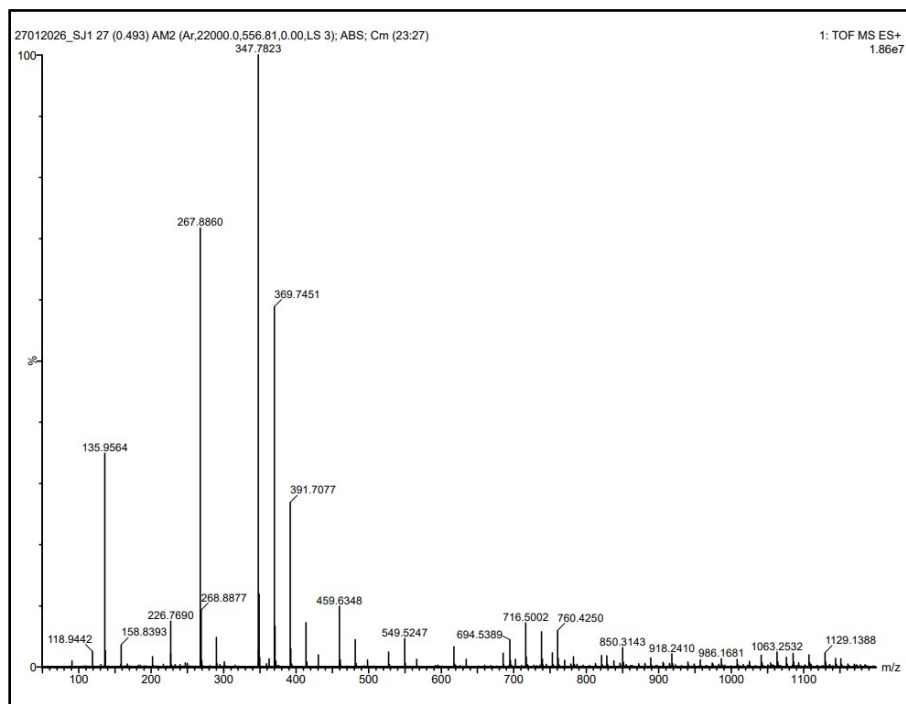

Figure S6. High-resolution mass spectrum of 3a





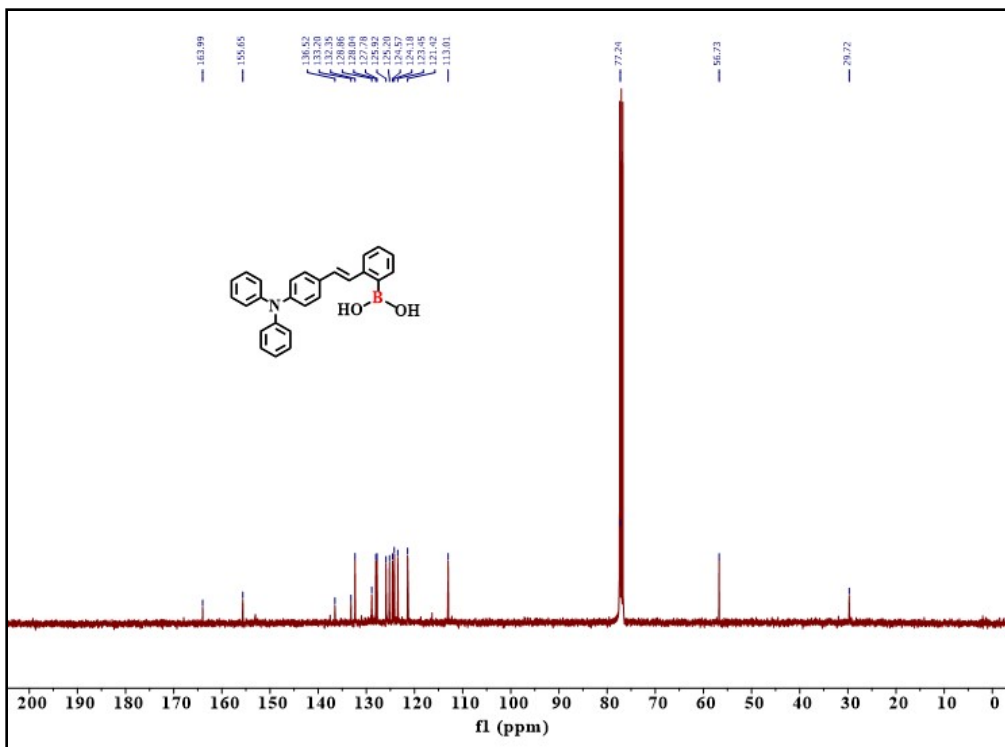

Figure S11. <sup>13</sup>C NMR (100 MHz, 298 K, CDCl<sub>3</sub>) spectrum of 3c

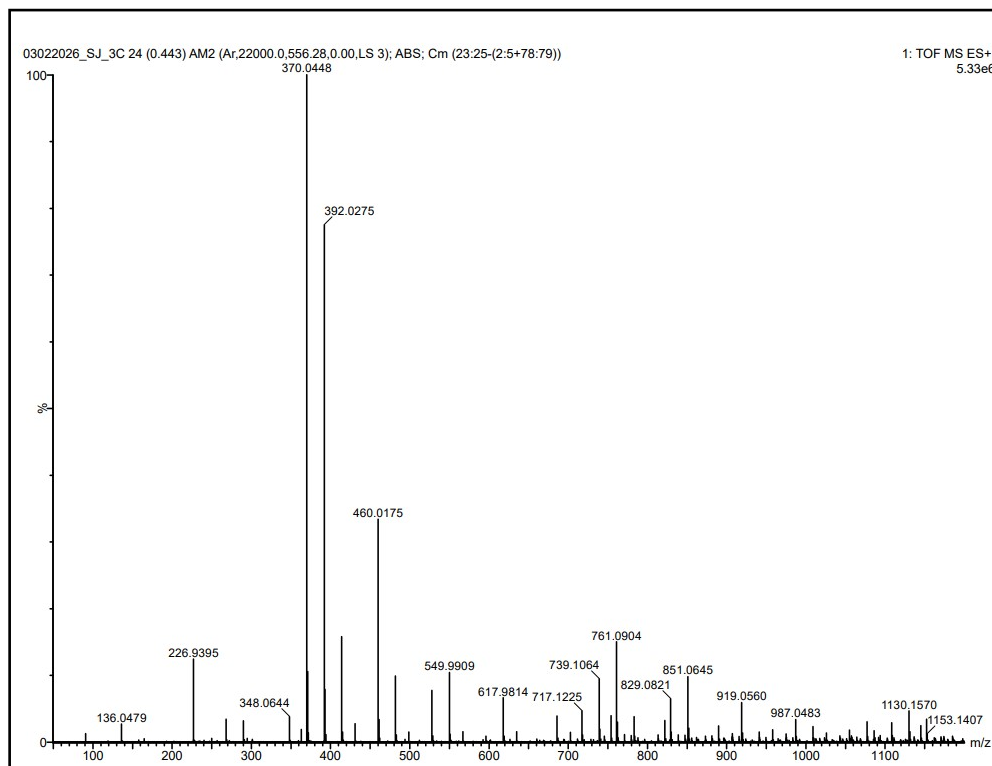

Figure S12. High-resolution mass spectrum of 3c

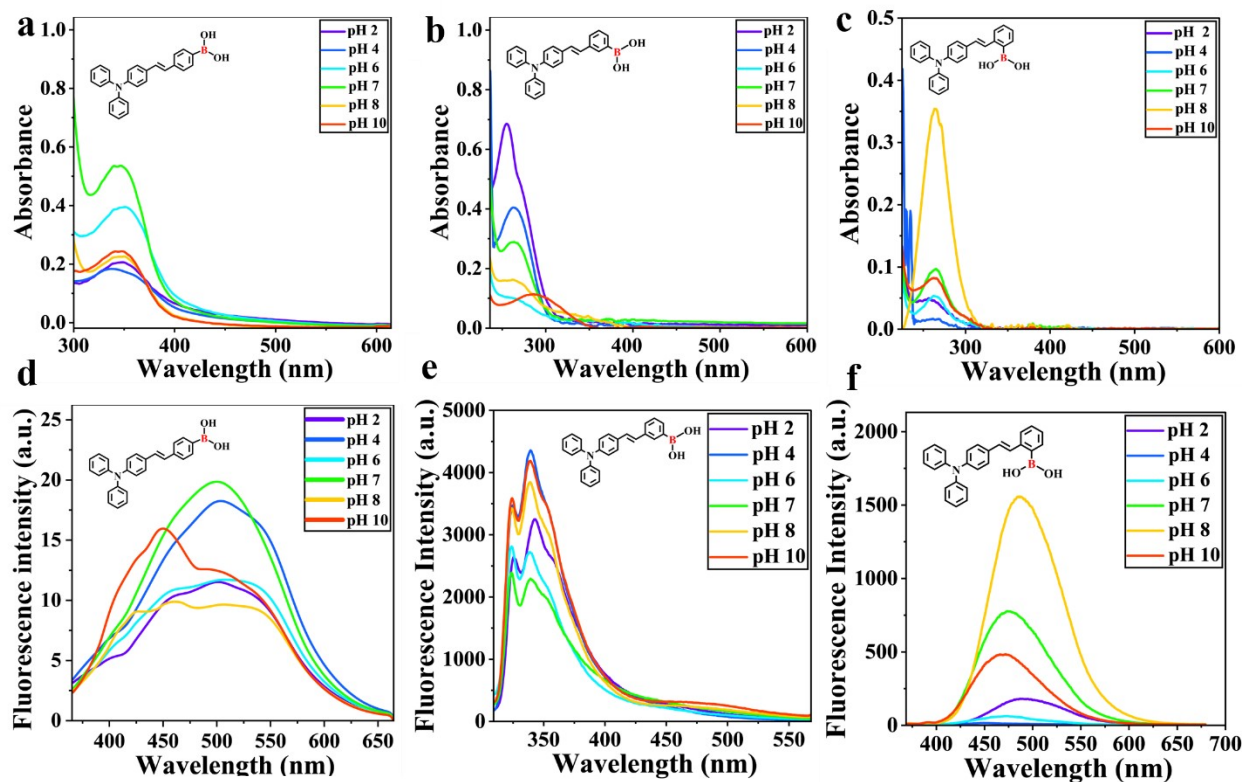

**Figure S13.** UV-Vis absorption spectra (a–c) and fluorescence emission spectra (d–f) of the compounds 3a, 3b, and 3c recorded at different pH levels (2–10). Sample concentration: (10  $\mu$ M)

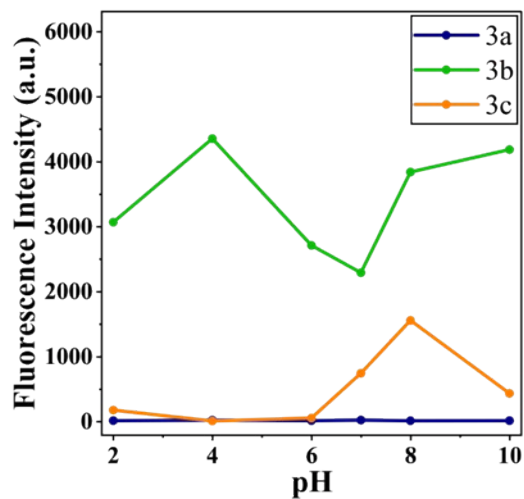

**Figure S14** Stability studies of 3a, 3b, and 3c over physiological pH range. Sample concentration: 10  $\mu$ M.

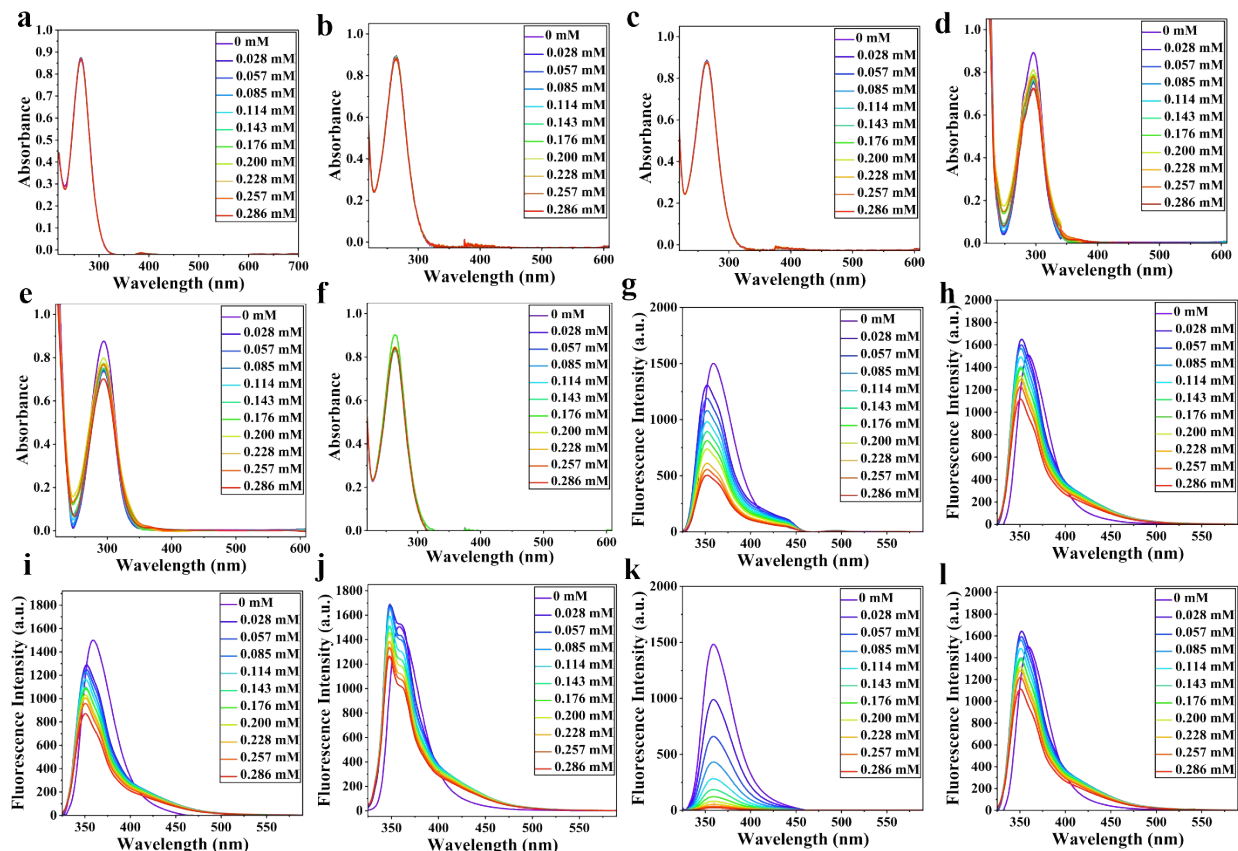

**Figure S15.** UV-Vis absorption spectra (a-f) and fluorescence emission spectra (g-l) for the titration of 3a with increasing concentrations of glucose (0 – 0.286 mM) in 2:8 ACN/PBS buffer at pH 2, 4, 6, 7, 8, and 10, respectively. Sample concentration: 10  $\mu$ M.

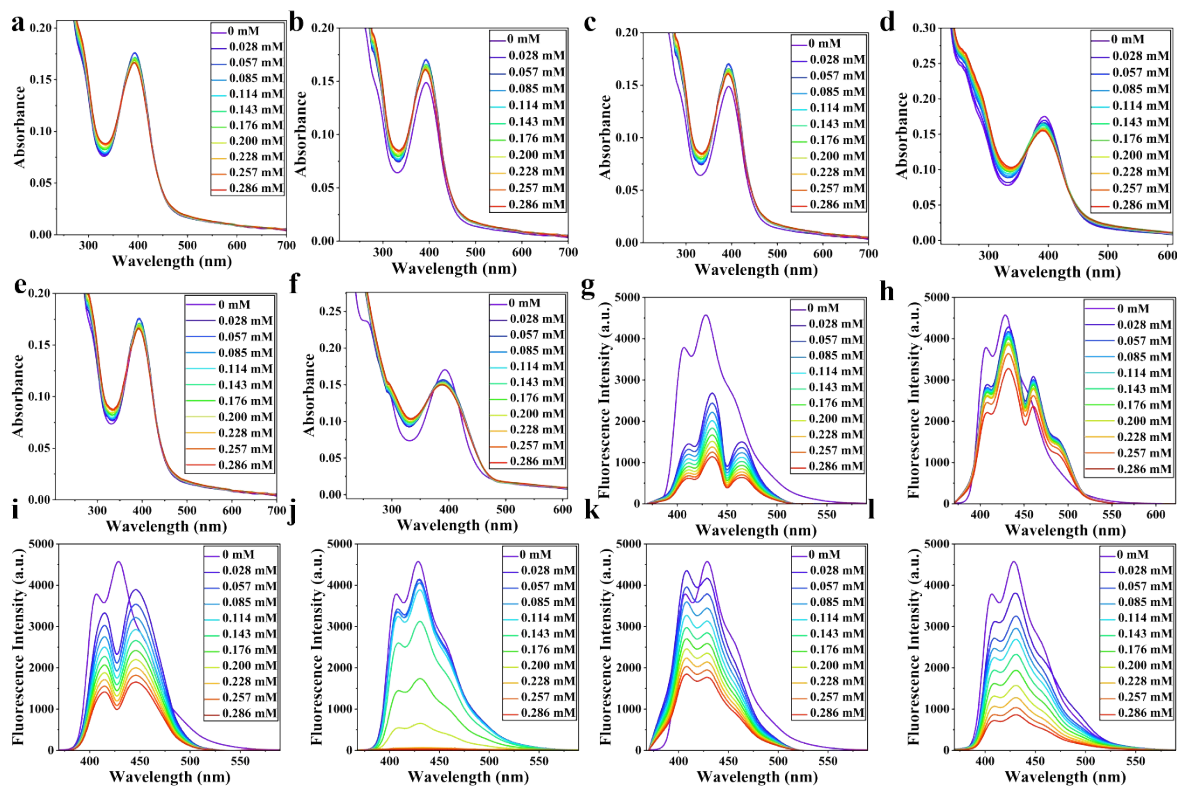

**Figure S16.** UV-Vis absorption spectra (a-f) and fluorescence emission spectra (g-l) for the titration of **3b** with increasing concentrations of glucose (0 – 0.286 mM) in 2:8 ACN/PBS buffer at pH 2, 4, 6, 7, 8, and 10, respectively. Sample concentration: 10  $\mu\text{M}$

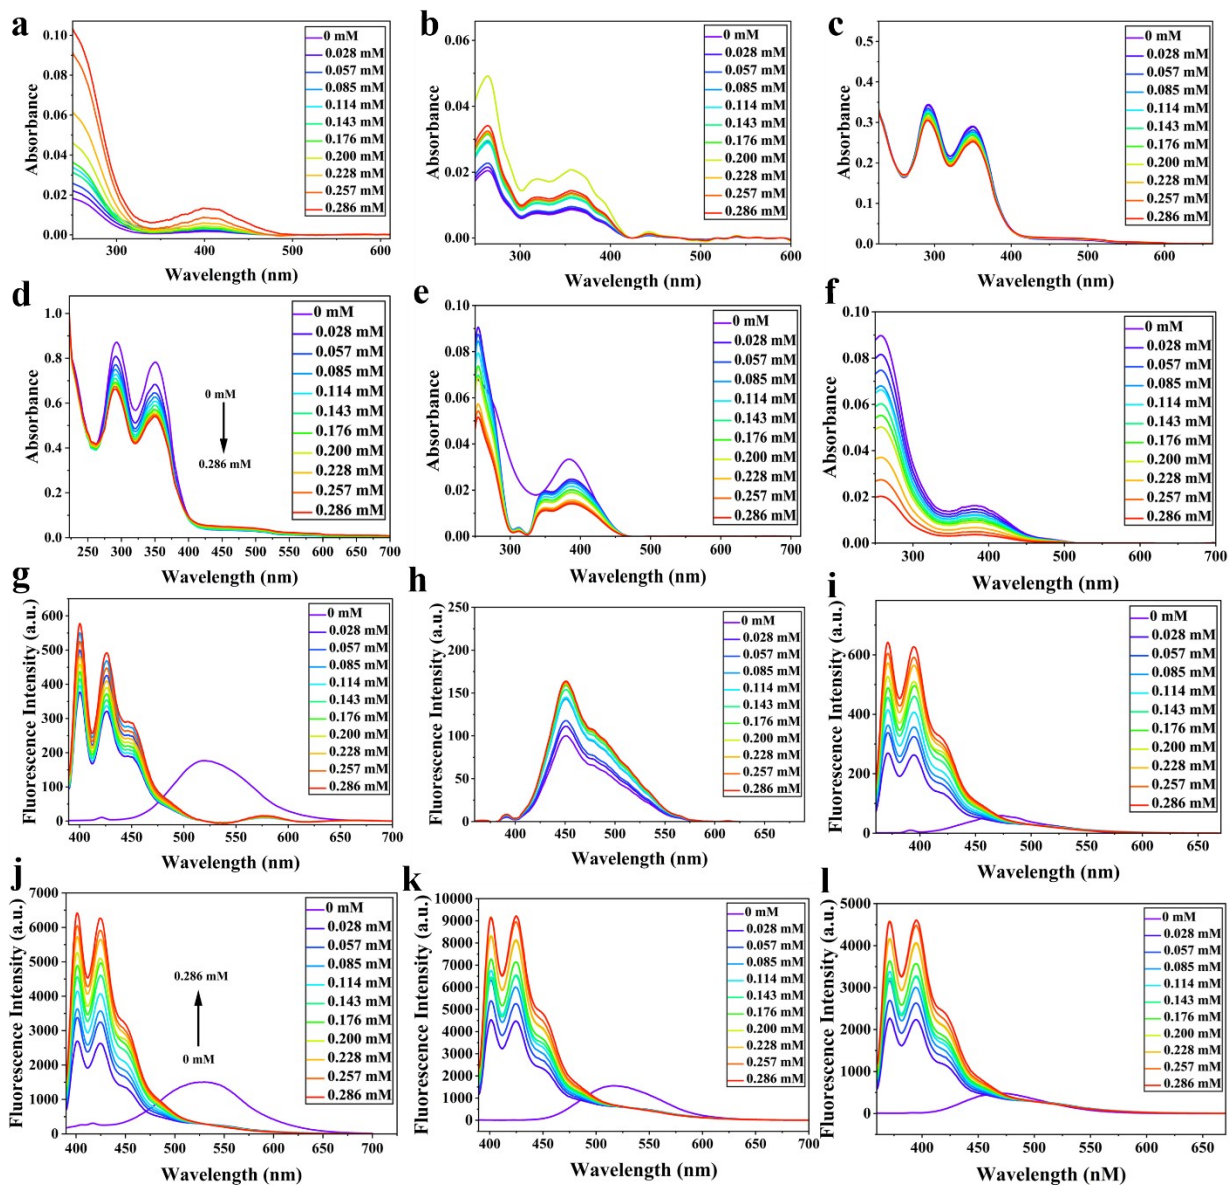

**Figure S17.** UV-Vis absorption spectra (a-f) and fluorescence emission spectra (g-l) for the titration of **3c** with increasing concentrations of glucose (0 – 0.286 mM) in 2:8 ACN/PBS buffer at pH 2, 4, 6, 7, 8, and 10, respectively. Sample concentration: 10  $\mu$ M

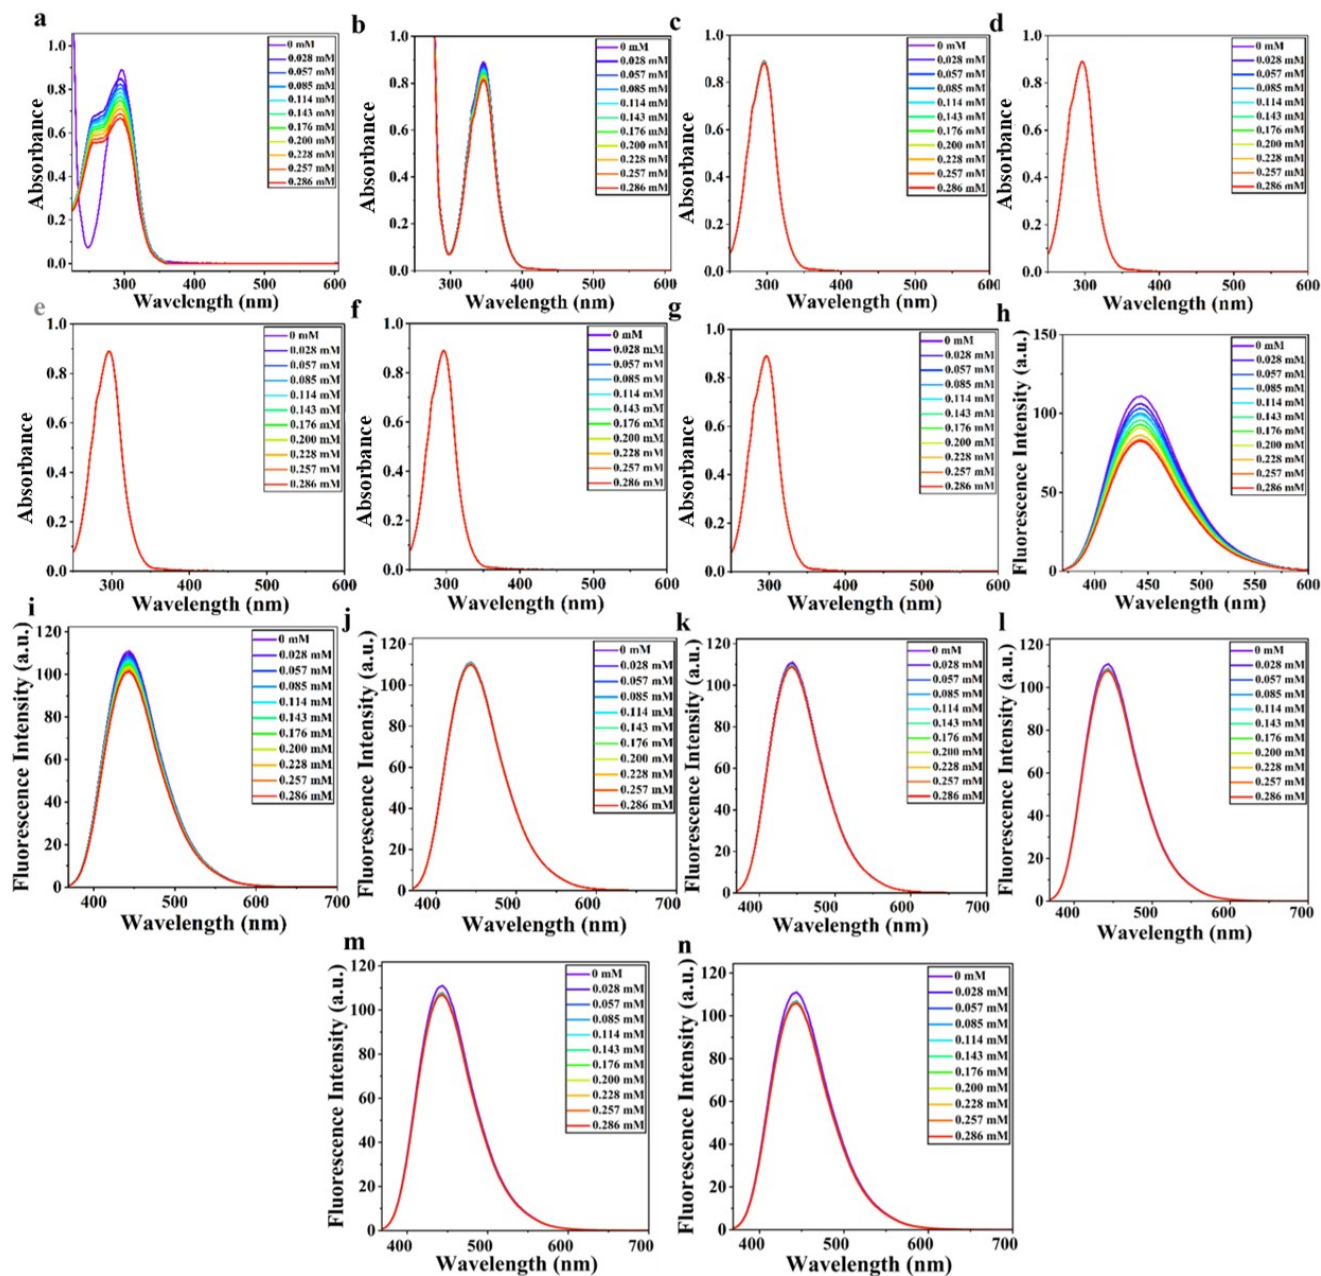

**Figure S18.** UV-Vis absorption spectra (a-g) and fluorescence emission spectra (h-n) of the compound **3a** in the presence of other competing saccharides (Fructose, Ribose, Mannose, Galactose, Maltose, Lactose, Sucrose). The sample solutions were maintained at 10  $\mu$ M in 2:8 ACN/PBS buffer (pH).

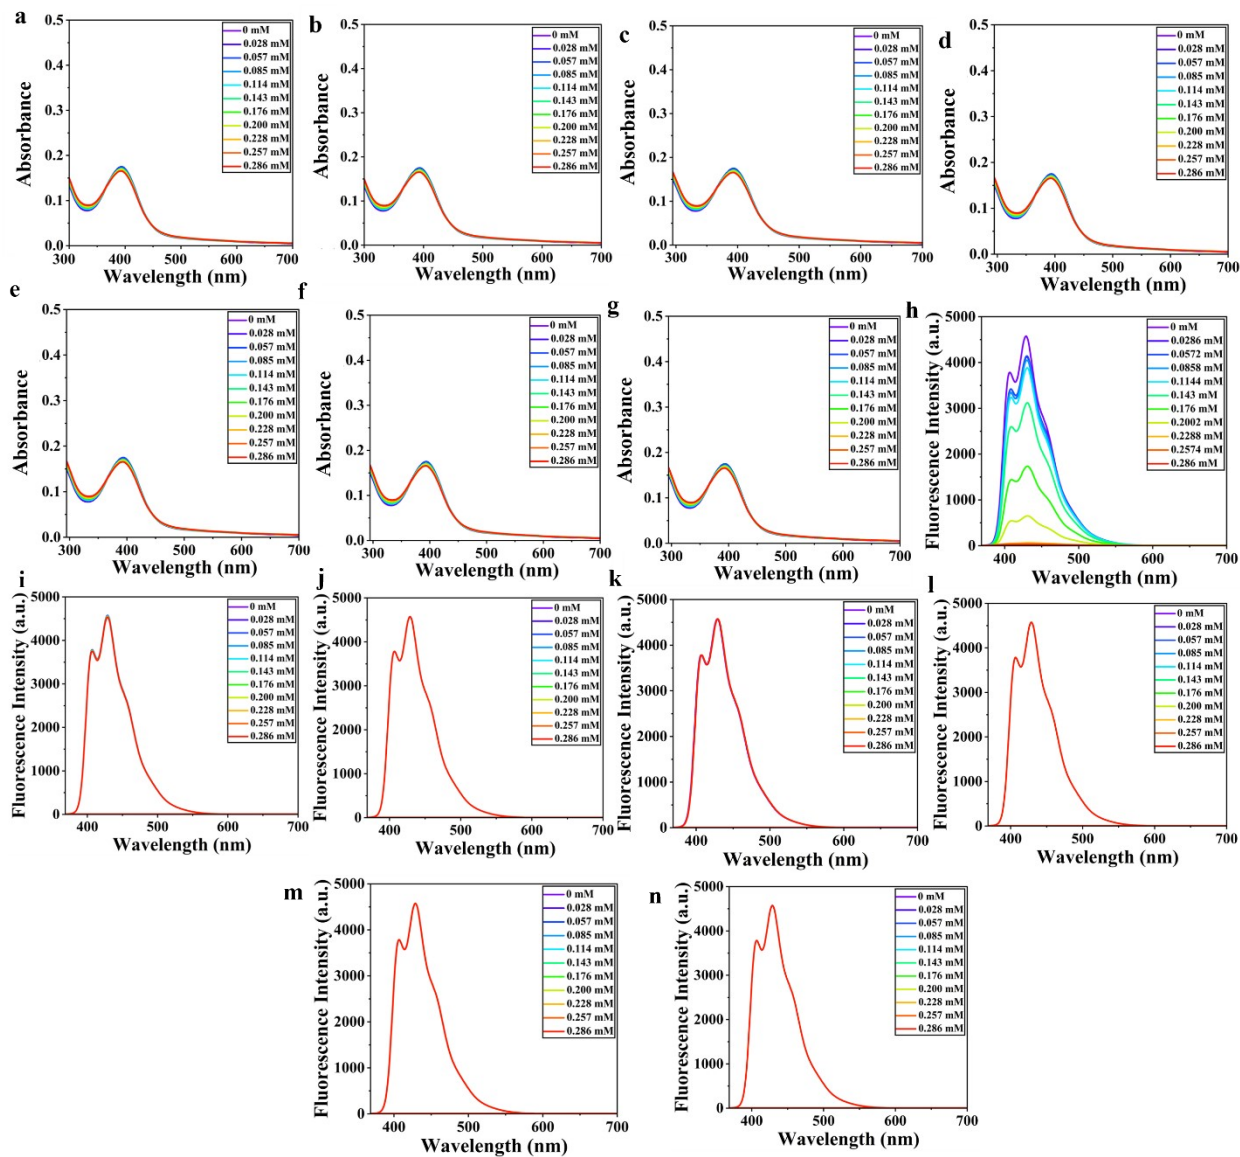

**Figure S19.** UV-Vis absorption spectra (a-g) and fluorescence emission spectra (h-n) of the compound **3b** in the presence of other competing saccharides (Fructose, Ribose, Mannose, Galactose, Maltose, Lactose, Sucrose). The sample solutions were maintained at 10  $\mu$ M in 2:8 ACN/PBS buffer (pH 7).

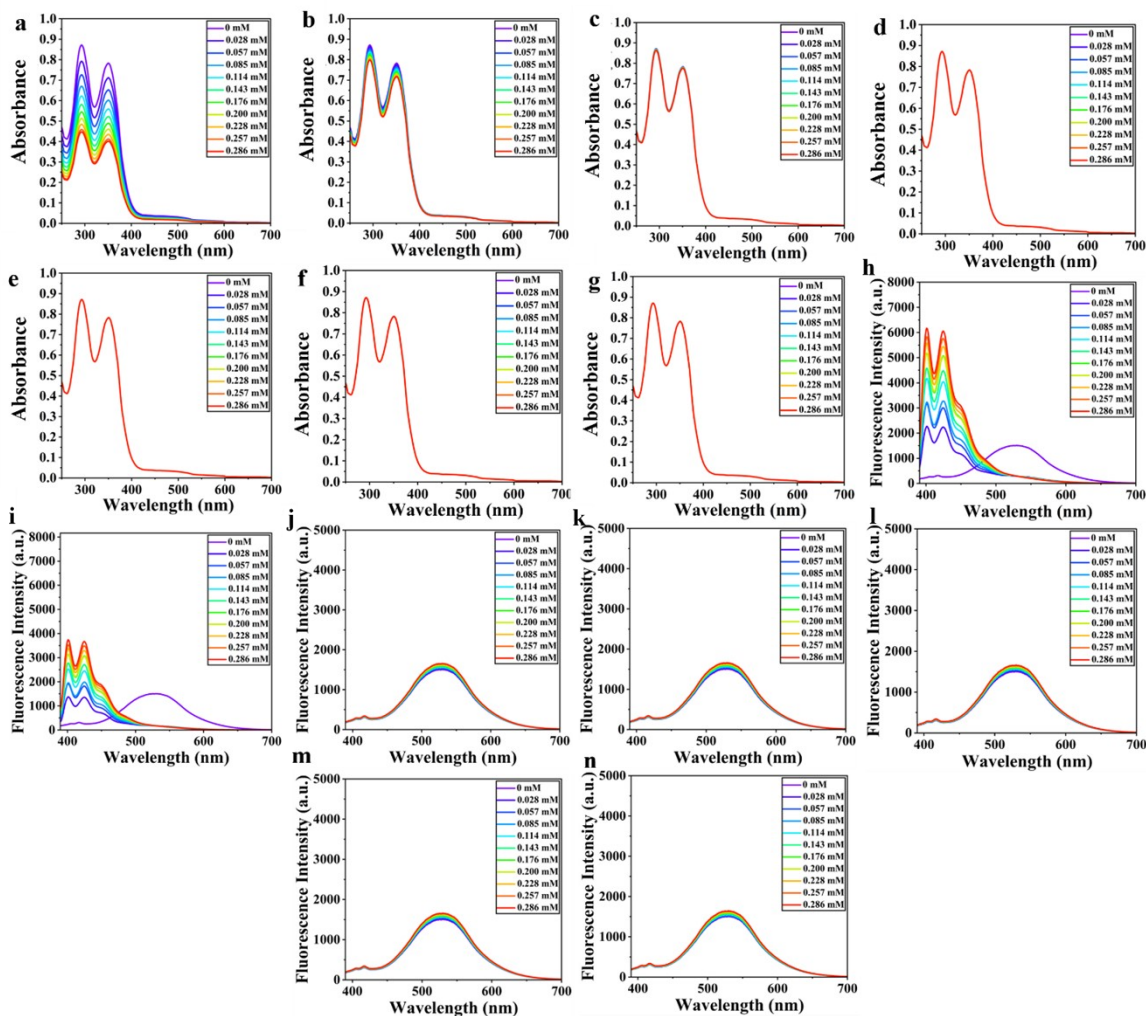

**Figure S20.** UV-Vis absorption spectra (a-g) and fluorescence emission spectra (h-n) of the compound **3c** in the presence of other competing saccharides (Fructose, Ribose, Mannose, Galactose, Maltose, Lactose, Sucrose). The sample solutions were maintained at 10  $\mu$ M in 2:8 ACN/PBS buffer (pH 7).

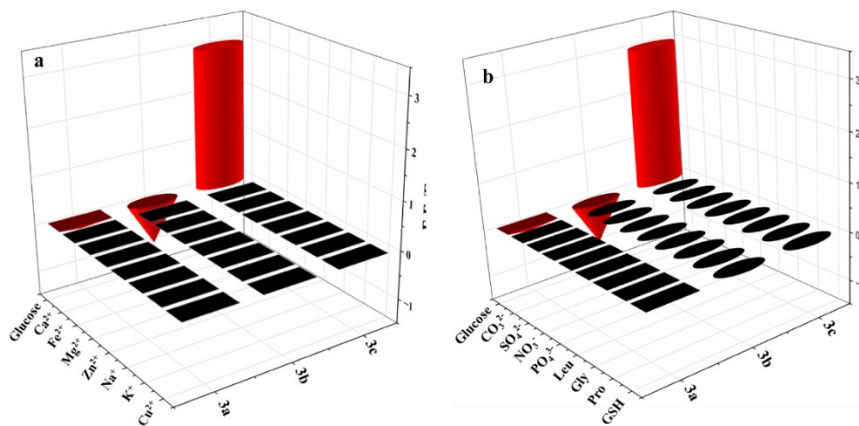

**Figure 21.** (a) Relative fluorescence response  $(F - F_0)/F_0$  of probes **3a**, **3b**, and **3c**, respectively, in the presence of various metal ions. (b) Relative fluorescence response  $(F - F_0)/F_0$  of probes **3a**, **3b**, and **3c**, respectively, in the presence of biologically relevant anions, amino acids, and GSH. [Leu: L-Leucine, Gly: L-Glycine, Pro: L-Proline, and GSH: Glutathione]

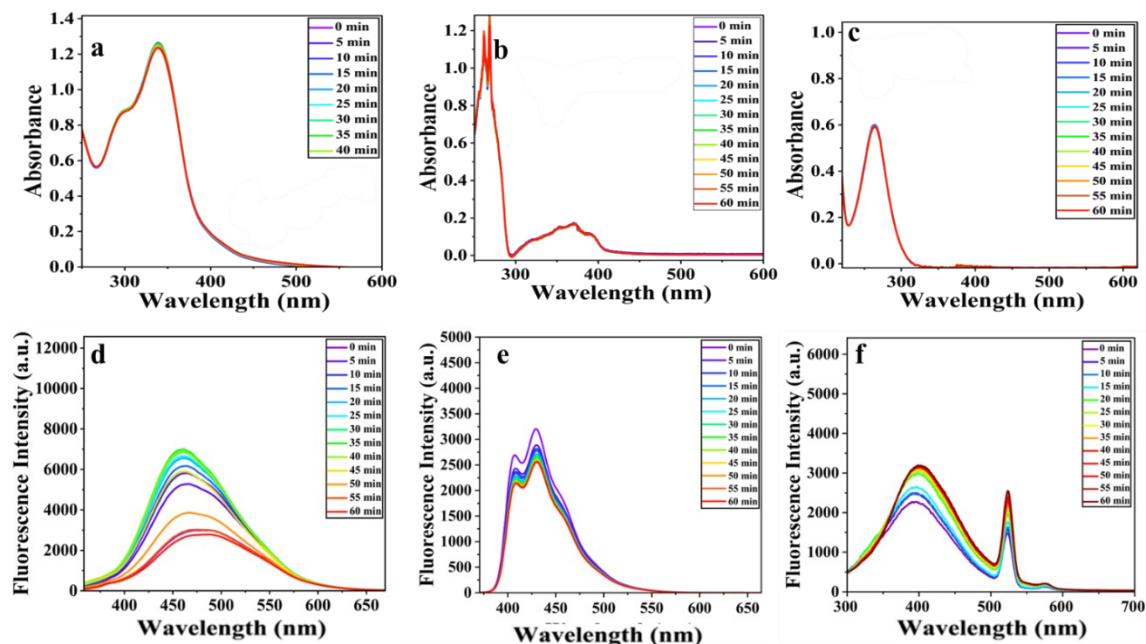

**Figure S22.** UV-Vis absorption spectra (a-c) and fluorescence emission spectra (d-f) of the compounds **3a**, **3b** and **3c** recorded at various time intervals from 0 to 60 minutes. Sample concentration: (10  $\mu$ M), solvent system: 2:8 ACN: PBS Buffer (pH 7)

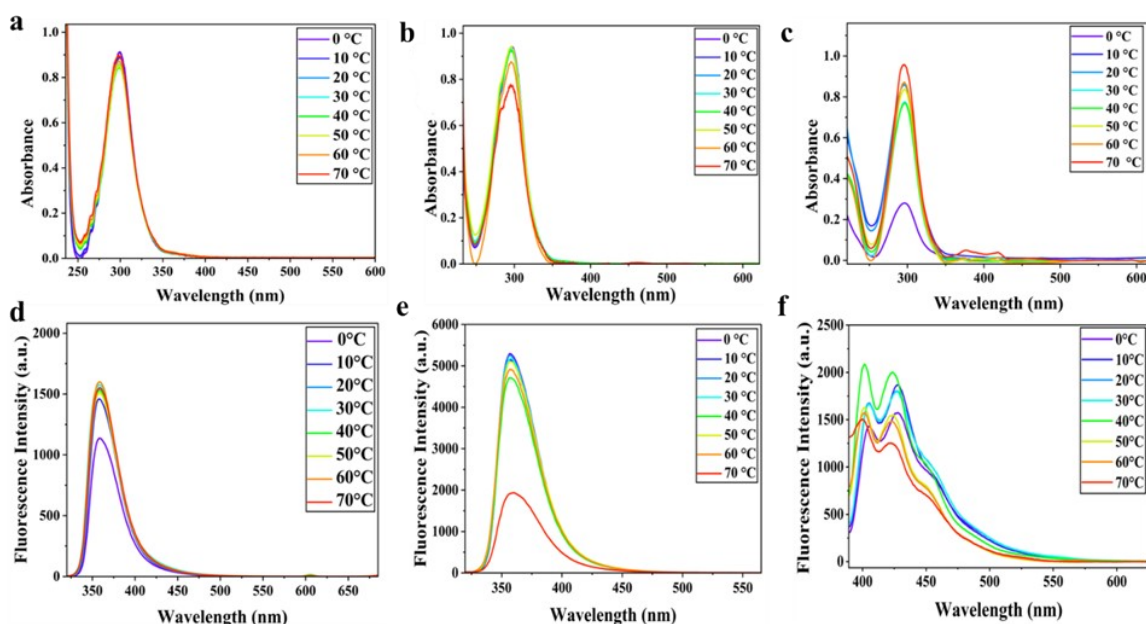

**Figure S23.** UV-Vis absorption spectra (a-c) and fluorescence emission spectra (d-f) of the compounds 3a, 3b and 3c recorded at various temperatures ranging from 0 to 70 °C. Sample concentration: (10 μM), solvent system: 2:8 ACN: PBS Buffer (pH 7).

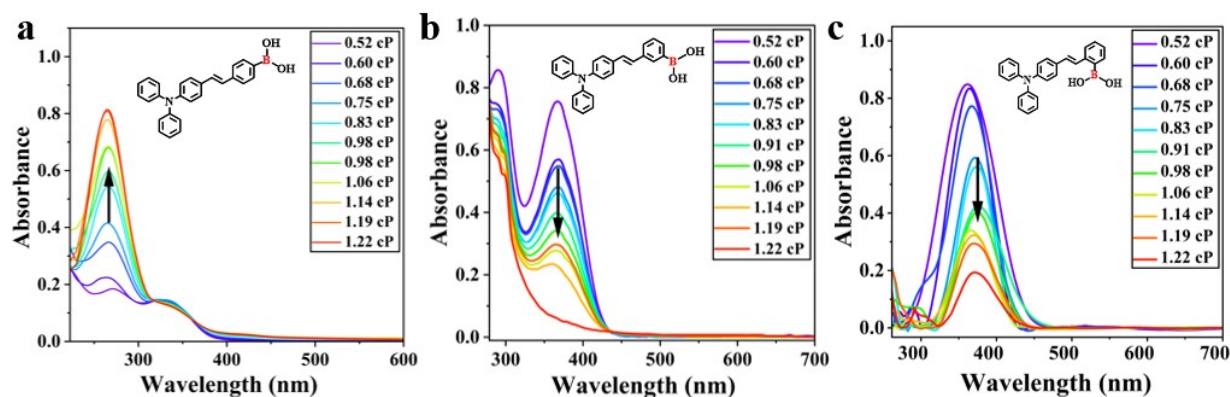

**Figure S24.** Absorbance spectra (a, b, c) of 3a, 3b, and 3c in solutions with varying viscosities (0.52–1.22 cP). Sample concentration: 10 μM. Solvent : THF.

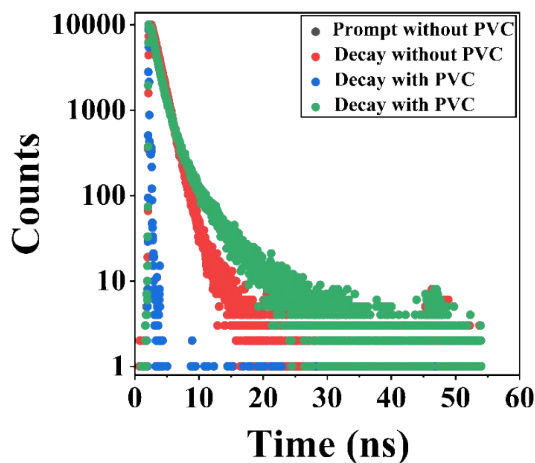

**Figure S25.** Fluorescence lifetime profile of 3c in the presence and absence of polyvinyl chloride (PVC).

### Viscosity-responsiveness of TPA-TBA probes 3a-c in Glycerol-Water System

To render better physiological relevance, the TPA-TBA probes (**3a-c**) were pre-treated with constant amount of glucose (0.028 mM) and subjected to absorption and fluorescence experiments in presence of viscosity gradient solvent comprising of 0%–100% glycerol/water mixture. With increasing content of glycerol, a gradual increase in fluorescence intensity was observed (**Figure S26**). With increasing glycerol, the viscosity of the medium rises, which restricts the rotation across TPA units. Restricted molecular rotation inhibits non-radiative decay consequently enhancing the radiative fluorescence response. The increase in fluorescence for **3a-c** under high viscous medium with greater glycerol content further supported the viscosity-responsiveness of the probes under physiological conditions.

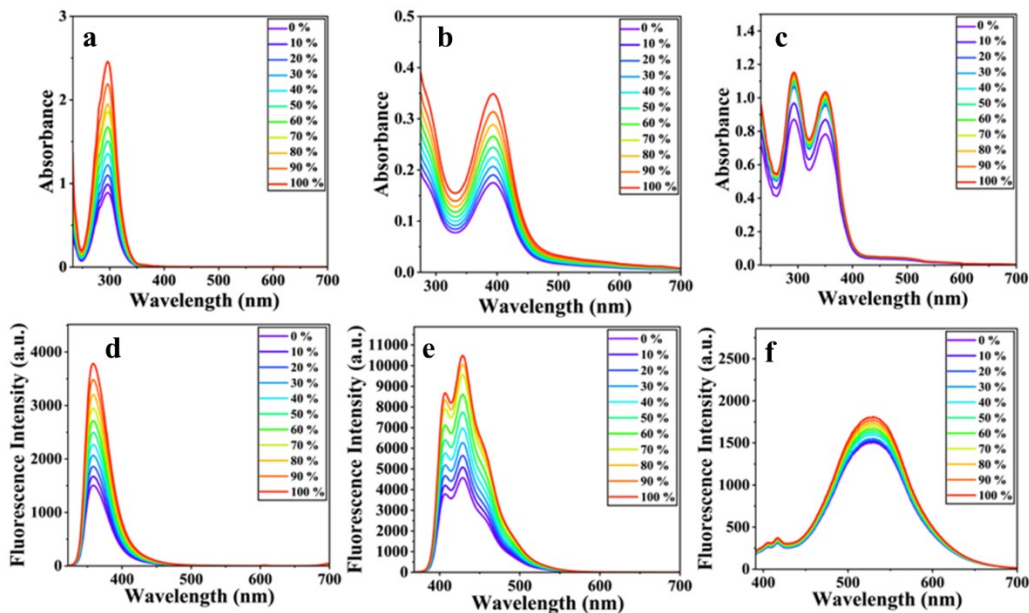

**Figure S26.** (a–c) Absorbance spectra and (d–f) fluorescence spectra of probes **3a**, **3b**, and **3c**, respectively, in water–glycerol mixtures with varying glycerol content (0–100%).

### Electronic Excitation Analysis of Boronate Ester Complexes of TPA-TBA Probes with Glucose

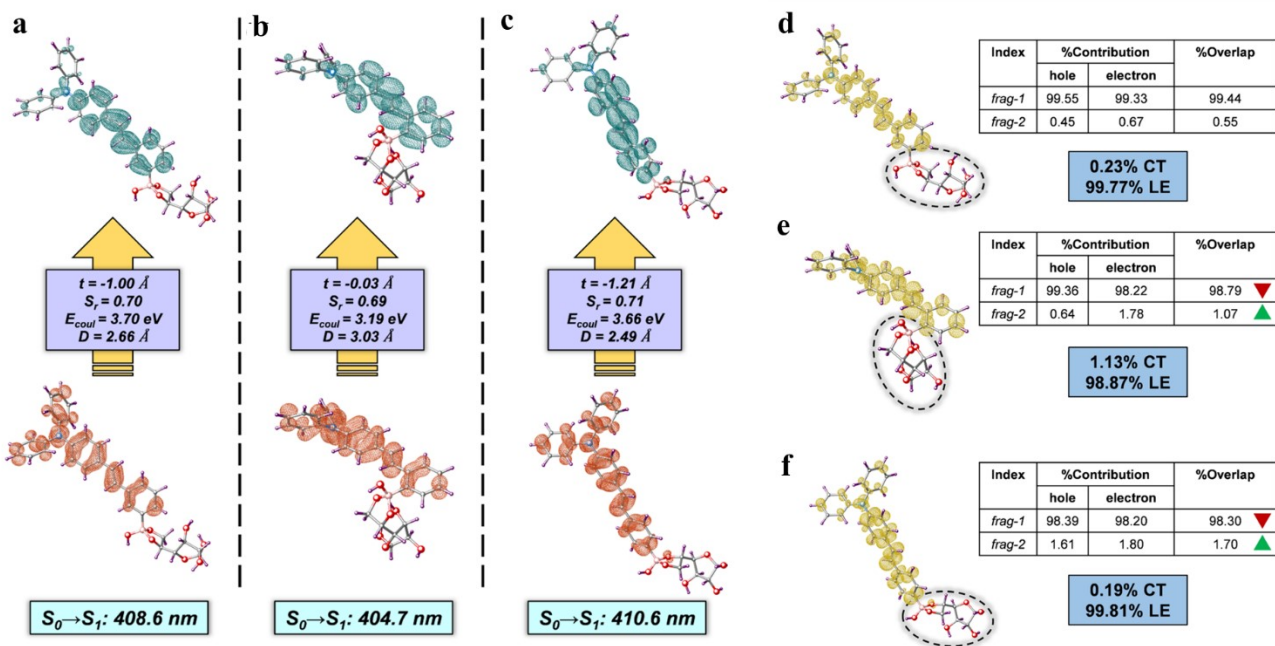

**Figure S27** (a–f) Computed photophysical properties of boronate ester complexes of TPA-TBA probes with glucose using CPCM (2: 8 ACN/PBS)-TD-B3LYP-D4/def2-TZVP(-f)//B3LYP-D4/def2-SVP level of theory. The isosurfaces of the hole transition distribution (HTD) and the electron transition distribution (ETD) for the optically bright  $S_0 \rightarrow S_1$  transition are shown in orange-red and dark cyan, respectively (isovalue = 0.001). Golden isosurfaces correspond to regions of hole-electron overlap. The hole-electron overlap ( $S_r$ ), exciton binding energy ( $E_{coul}$ ), overall estimate of the degree of spatial extension of HTD and ETD ( $H$ ), and separation degree of hole and electron in the charge-transfer

(CT) direction (*t*) are shown. The real-space analyses of the electronic excitation of the TPA-TBA-glucose complexes are shown as follows: (a, d) meta, (b, e) ortho, and (c, f) para. Hole-electron %contributions, %overlap indices, and apparent charge-transfer (CT) and local excitation (LE) % contributions are shown in the corresponding tables. Grey-dotted areas denote the boron centre containing fragments (*frag-2*) used for the IFCT calculation.

**Table S1. Binding constant of saccharides for 3a, 3b, 3c**

| Compound  | Glucose                              | Fructose                               | Ribose                                | Mannose                               | Galactose                             | Maltose                               | Lactose                               | Sucrose                               |
|-----------|--------------------------------------|----------------------------------------|---------------------------------------|---------------------------------------|---------------------------------------|---------------------------------------|---------------------------------------|---------------------------------------|
| <b>3a</b> | $1.8 \times 10^3$<br>M <sup>-1</sup> | $1.4 \times 10^3$<br>M <sup>-1</sup>   | $0.5 \times 10^3$<br>M <sup>-1</sup>  | $0.05 \times 10^3$<br>M <sup>-1</sup> | $0.02 \times 10^3$<br>M <sup>-1</sup> | $0.15 \times 10^3$<br>M <sup>-1</sup> | $0.25 \times 10^3$<br>M <sup>-1</sup> | $0.30 \times 10^3$<br>M <sup>-1</sup> |
| <b>3b</b> | $2.0 \times 10^3$<br>M <sup>-1</sup> | $2.0 \times 10^3$<br>M <sup>-1</sup>   | $0.05 \times 10^3$<br>M <sup>-1</sup> | $0.02 \times 10^3$<br>M <sup>-1</sup> | $0.01 \times 10^3$<br>M <sup>-1</sup> |
| <b>3c</b> | $5.7 \times 10^3$<br>M <sup>-1</sup> | $0.843 \times 10^3$<br>M <sup>-1</sup> | $0.62 \times 10^3$<br>M <sup>-1</sup> | $0.03 \times 10^3$<br>M <sup>-1</sup> | $0.02 \times 10^3$<br>M <sup>-1</sup> | $0.01 \times 10^3$<br>M <sup>-1</sup> | $0.01 \times 10^3$<br>M <sup>-1</sup> | $0.05 \times 10^3$<br>M <sup>-1</sup> |

**Table S2. Cartesian Coordinates of the DFT computed geometry for 3a**

| <b>In absence of Glucose</b> |           |          |          |   |           |          |          |
|------------------------------|-----------|----------|----------|---|-----------|----------|----------|
|                              |           |          |          | C | -1.97756  | 0.08405  | 0.70338  |
| N                            | -7.61968  | 0.09564  | -0.05806 | C | -1.04222  | -0.61963 | 0.04455  |
| C                            | -8.28861  | -1.05000 | -0.55005 | C | 0.39797   | -0.56858 | 0.26367  |
| C                            | -9.30731  | -0.91837 | -1.49676 | C | 1.21948   | -1.48192 | -0.41156 |
| C                            | -9.97223  | -2.04114 | -1.96846 | C | 2.59430   | -1.47204 | -0.24037 |
| C                            | -9.62334  | -3.31005 | -1.51803 | C | 3.22182   | -0.54980 | 0.60367  |
| C                            | -8.60404  | -3.44338 | -0.58102 | B | 4.77037   | -0.50561 | 0.79925  |
| C                            | -7.94529  | -2.32419 | -0.09208 | O | 5.63531   | -1.45201 | 0.30438  |
| C                            | -8.36838  | 1.25419  | 0.26107  | O | 5.31422   | 0.53352  | 1.50203  |
| C                            | -9.58587  | 1.14367  | 0.93617  | C | 2.39503   | 0.36720  | 1.27233  |
| C                            | -10.32322 | 2.27974  | 1.23894  | C | 1.02245   | 0.36099  | 1.11115  |
| C                            | -9.85294  | 3.54081  | 0.88850  | C | -4.26017  | 0.74471  | 1.35988  |
| C                            | -8.63765  | 3.65279  | 0.22088  | C | -5.63456  | 0.75146  | 1.20043  |
| C                            | -7.90238  | 2.52052  | -0.09961 | H | -9.57487  | 0.06665  | -1.85423 |
| C                            | -6.22507  | 0.08026  | 0.12633  | H | -10.75935 | -1.92338 | -2.70248 |
| C                            | -5.39163  | -0.60014 | -0.77239 | H | -10.13974 | -4.18415 | -1.89212 |
| C                            | -4.02281  | -0.61265 | -0.59571 | H | -8.32806  | -4.42452 | -0.21579 |
| C                            | -3.41472  | 0.05865  | 0.47715  | H | -7.16102  | -2.42980 | 0.64510  |

|   |           |          |          |   |          |          |          |
|---|-----------|----------|----------|---|----------|----------|----------|
| H | -9.94987  | 0.16461  | 1.21668  | H | 0.76447  | -2.20519 | -1.07809 |
| H | -11.26475 | 2.17805  | 1.76372  | H | 3.18179  | -2.19609 | -0.79661 |
| H | -10.42647 | 4.42545  | 1.13186  | H | 5.20549  | -2.18476 | -0.14450 |
| H | -8.26412  | 4.62778  | -0.06559 | H | 6.27212  | 0.46061  | 1.57839  |
| H | -6.96243  | 2.60974  | -0.62717 | H | 2.85151  | 1.10035  | 1.92497  |
| H | -5.83063  | -1.11260 | -1.61738 | H | 0.42702  | 1.09660  | 1.63562  |
| H | -3.41216  | -1.13140 | -1.32286 | H | -3.82558 | 1.27096  | 2.20162  |
| H | -1.66210  | 0.74561  | 1.50385  | H | -6.25882 | 1.28152  | 1.90627  |
| H | -1.35619  | -1.31471 | -0.72746 |   |          |          |          |

### In the presence of glucose

|   |          |          |          |   |           |          |          |
|---|----------|----------|----------|---|-----------|----------|----------|
| N | -7.16490 | 0.31320  | -0.01188 | C | 1.47750   | -2.18618 | -0.78161 |
| C | -7.97104 | -0.84864 | -0.00336 | C | 2.86210   | -2.33239 | -0.67622 |
| C | -9.10227 | -0.94015 | -0.83432 | C | 3.64642   | -1.49161 | 0.13608  |
| C | -9.89670 | -2.08727 | -0.81874 | B | 5.27995   | -1.62018 | 0.19759  |
| C | -9.57116 | -3.16844 | 0.00808  | O | 5.73195   | -2.99605 | -0.00419 |
| C | -8.44101 | -3.08350 | 0.82879  | C | 2.94795   | -0.49229 | 0.84656  |
| C | -7.65094 | -1.93310 | 0.83292  | C | 1.56716   | -0.33066 | 0.75230  |
| C | -7.76163 | 1.59376  | -0.07416 | C | -3.62348  | 0.92040  | 0.97199  |
| C | -8.93527 | 1.87313  | 0.64872  | C | -5.00821  | 1.04679  | 0.89926  |
| C | -9.52056 | 3.13815  | 0.58009  | H | -9.35449  | -0.10728 | -1.49340 |
| C | -8.94032 | 4.15075  | -0.19191 | H | -10.77232 | -2.14124 | -1.47154 |
| C | -7.76792 | 3.87759  | -0.90567 | H | -10.19116 | -4.06828 | 0.01192  |
| C | -7.18554 | 2.61044  | -0.85666 | H | -8.17587  | -3.91690 | 1.48515  |
| C | -5.75670 | 0.19376  | 0.07263  | H | -6.77871  | -1.86917 | 1.48604  |
| C | -5.07443 | -0.78676 | -0.67221 | H | -9.38529  | 1.09331  | 1.26581  |
| C | -3.69401 | -0.91687 | -0.58092 | H | -10.43263 | 3.33759  | 1.14938  |
| C | -2.92521 | -0.06671 | 0.24515  | H | -9.39709  | 5.14246  | -0.23653 |
| C | -1.47194 | -0.16259 | 0.38274  | H | -7.30625  | 4.65582  | -1.51955 |
| C | -0.65917 | -1.06861 | -0.20987 | H | -6.27810  | 2.40042  | -1.42588 |
| C | 0.79320  | -1.17849 | -0.07030 | H | -5.64005  | -1.45173 | -1.32813 |

|   |          |          |          |   |          |          |          |
|---|----------|----------|----------|---|----------|----------|----------|
| H | -3.20158 | -1.68810 | -1.17732 | C | 6.53803  | 0.31210  | -0.24096 |
| H | -1.02901 | 0.58774  | 1.04627  | H | 7.24166  | 0.92207  | -2.14142 |
| H | -1.10605 | -1.81939 | -0.87170 | H | 9.86642  | 2.99654  | -0.76697 |
| H | 0.90219  | -2.86210 | -1.42374 | O | 9.13007  | 3.09508  | 1.08045  |
| H | 3.35730  | -3.13110 | -1.23866 | H | 9.92687  | -1.46853 | -0.89314 |
| H | 5.18136  | -3.58467 | 0.52667  | H | 11.48001 | 1.20565  | -0.88126 |
| H | 3.52015  | 0.16800  | 1.50479  | H | 8.58253  | 2.58506  | 1.69895  |
| H | 1.07878  | 0.45918  | 1.33032  | C | 6.85947  | -0.19429 | 1.17549  |
| H | -3.06076 | 1.59407  | 1.62466  | O | 5.92947  | -0.78490 | -0.85805 |
| H | -5.51795 | 1.81190  | 1.48815  | H | 5.81867  | 1.15950  | -0.13458 |
| C | 7.65280  | 0.88934  | -1.11909 | H | 7.80839  | -0.76713 | 1.17254  |
| C | 9.04059  | 0.22531  | -1.12224 | O | 5.76311  | -1.00999 | 1.48040  |
| C | 9.76647  | 0.95892  | 0.00324  | H | 6.96137  | 0.63269  | 1.90632  |
| H | 9.54475  | 0.52144  | -2.06935 |   |          |          |          |
| O | 9.01060  | -1.17200 | -1.00002 |   |          |          |          |
| C | 9.21022  | 2.38721  | -0.11524 |   |          |          |          |
| O | 11.17095 | 0.85209  | -0.03269 |   |          |          |          |
| H | 9.45677  | 0.53855  | 0.97341  |   |          |          |          |
| O | 7.93432  | 2.24767  | -0.71812 |   |          |          |          |

**Table S3. Cartesian Coordinates of the DFT computed geometry for 3b**

**In absence of Glucose**

|   |          |          |          |   |          |          |          |
|---|----------|----------|----------|---|----------|----------|----------|
| N | -2.75699 | 7.05516  | 0.83367  | C | -2.15713 | 11.11586 | 1.78396  |
| C | -4.04541 | 6.60567  | 0.46260  | C | -1.21170 | 10.42127 | 1.03629  |
| C | -4.84253 | 7.37203  | -0.39165 | C | -1.40902 | 9.08608  | 0.71492  |
| C | -6.10976 | 6.93307  | -0.74697 | C | -1.68568 | 6.14248  | 0.91338  |
| C | -6.59706 | 5.71989  | -0.27206 | C | -1.55478 | 5.11216  | -0.02708 |
| C | -5.80221 | 4.95224  | 0.57261  | C | -0.51198 | 4.21076  | 0.05256  |
| C | -4.54042 | 5.39202  | 0.94645  | C | 0.45821  | 4.29852  | 1.06348  |
| C | -2.55528 | 8.41817  | 1.15334  | C | 1.57618  | 3.37346  | 1.19232  |
| C | -3.50025 | 9.11532  | 1.91018  | C | 1.77406  | 2.24389  | 0.49445  |
| C | -3.30312 | 10.45504 | 2.21346  | C | 2.90013  | 1.32322  | 0.62178  |

|   |          |          |          |   |          |          |          |
|---|----------|----------|----------|---|----------|----------|----------|
| C | 2.85449  | 0.09825  | -0.05404 | H | -2.00313 | 12.15873 | 2.02780  |
| C | 3.88640  | -0.84052 | 0.02696  | H | -0.31891 | 10.92509 | 0.68783  |
| C | 5.00239  | -0.52979 | 0.81140  | H | -0.67680 | 8.55124  | 0.12549  |
| B | 3.79853  | -2.19728 | -0.73722 | H | -2.28023 | 5.02824  | -0.82478 |
| O | 2.66917  | -2.46235 | -1.47239 | H | -0.43604 | 3.43906  | -0.70199 |
| O | 4.85788  | -3.06531 | -0.63720 | H | 2.29940  | 3.64920  | 1.95336  |
| C | 5.07438  | 0.68480  | 1.48524  | H | 1.02974  | 1.94174  | -0.23530 |
| C | 4.04016  | 1.60149  | 1.39107  | H | 1.98459  | -0.13073 | -0.65835 |
| C | 0.32370  | 5.34571  | 1.98507  | H | 5.81541  | -1.24010 | 0.88692  |
| C | -0.72716 | 6.24485  | 1.92382  | H | 2.65187  | -3.30552 | -1.93411 |
| H | -4.46366 | 8.31146  | -0.77067 | H | 4.77316  | -3.89517 | -1.11529 |
| H | -6.71452 | 7.53824  | -1.41056 | H | 5.94603  | 0.92102  | 2.08317  |
| H | -7.58315 | 5.37722  | -0.55657 | H | 4.12371  | 2.54751  | 1.90990  |
| H | -6.17120 | 4.00956  | 0.95667  | H | 1.05341  | 5.44274  | 2.78040  |
| H | -3.92965 | 4.79717  | 1.61171  | H | -0.80851 | 7.03341  | 2.65917  |
| H | -4.38814 | 8.60204  | 2.25326  |   |          |          |          |
| H | -4.04455 | 10.98110 | 2.80153  |   |          |          |          |

### In the presence of glucose

|   |          |          |          |   |          |          |          |
|---|----------|----------|----------|---|----------|----------|----------|
| C | 8.09947  | 0.74407  | -0.19947 | H | 7.11306  | -2.33340 | -0.74931 |
| C | 7.99553  | -0.59510 | -0.93501 | H | 10.28945 | 0.59916  | -1.65941 |
| C | 9.47893  | -1.02349 | -0.93562 | H | 8.55339  | -1.85051 | 1.22700  |
| H | 7.59004  | -0.46412 | -1.94981 | C | 6.35158  | 0.65410  | 1.77932  |
| O | 7.23728  | -1.54934 | -0.19453 | O | 5.79276  | 1.40166  | -0.34869 |
| C | 9.86101  | -0.65219 | 0.51189  | H | 7.21519  | 2.36822  | 0.82023  |
| O | 10.25369 | -0.33959 | -1.89584 | H | 6.40580  | -0.44683 | 1.68351  |
| H | 9.59834  | -2.10039 | -1.12681 | O | 5.02982  | 1.11470  | 1.85758  |
| O | 9.20455  | 0.59212  | 0.72195  | H | 6.92879  | 0.93936  | 2.67896  |
| C | 6.89091  | 1.34347  | 0.51458  | N | -6.96082 | 0.03923  | -0.03340 |
| H | 8.39454  | 1.47943  | -0.97323 | C | -7.50192 | 1.33035  | -0.23539 |
| H | 10.94468 | -0.49350 | 0.63012  | C | -8.50527 | 1.82504  | 0.61697  |
| O | 9.47635  | -1.61616 | 1.44282  | C | -9.04271 | 3.09593  | 0.40937  |

|   |          |          |          |   |           |          |          |
|---|----------|----------|----------|---|-----------|----------|----------|
| C | -8.57970 | 3.90257  | -0.63621 | C | -3.71465  | -1.54224 | -0.94202 |
| C | -7.57376 | 3.41691  | -1.47896 | C | -5.08475  | -1.32764 | -0.82228 |
| C | -7.04259 | 2.14025  | -1.28913 | H | -8.86121  | 1.20721  | 1.44351  |
| C | -7.80826 | -1.03788 | 0.31606  | H | -9.82221  | 3.46441  | 1.08188  |
| C | -9.07121 | -1.17852 | -0.28677 | H | -8.99811  | 4.90001  | -0.79189 |
| C | -9.90633 | -2.23978 | 0.06508  | H | -7.20508  | 4.03302  | -2.30364 |
| C | -9.49390 | -3.18814 | 1.00765  | H | -6.26705  | 1.76293  | -1.95836 |
| C | -8.23418 | -3.05540 | 1.60259  | H | -9.39403  | -0.45098 | -1.03370 |
| C | -7.39973 | -1.98782 | 1.26939  | H | -10.88446 | -2.33319 | -0.41482 |
| C | -5.56982 | -0.17583 | -0.18231 | H | -10.14722 | -4.02213 | 1.27550  |
| C | -4.63981 | 0.75653  | 0.31567  | H | -7.89991  | -3.78411 | 2.34614  |
| C | -3.27355 | 0.54320  | 0.17558  | H | -6.42395  | -1.88447 | 1.74751  |
| C | -2.76884 | -0.61673 | -0.45316 | H | -4.99968  | 1.65400  | 0.82262  |
| C | -1.34313 | -0.90534 | -0.60825 | H | -2.58342  | 1.28505  | 0.58352  |
| C | -0.30522 | -0.11463 | -0.24898 | H | -1.12889  | -1.87695 | -1.06614 |
| C | 1.12165  | -0.42204 | -0.38207 | H | -0.51708  | 0.86498  | 0.19455  |
| C | 2.07125  | 0.54368  | 0.01577  | H | 1.70610   | 1.50184  | 0.40020  |
| C | 3.45961  | 0.34155  | -0.06162 | H | 4.95373   | -1.10430 | -0.63785 |
| C | 3.88310  | -0.90094 | -0.56881 | H | 4.45376   | 3.36178  | 0.98418  |
| B | 4.53182  | 1.44932  | 0.48178  | H | 3.32818   | -2.84029 | -1.36326 |
| O | 3.89182  | 2.75660  | 0.48350  | H | 0.89521   | -2.42903 | -1.20175 |
| C | 2.96737  | -1.88223 | -0.97385 | H | -3.35895  | -2.44824 | -1.44109 |
| C | 1.59613  | -1.65248 | -0.88527 | H | -5.78877  | -2.05954 | -1.22292 |

**Table S4. Cartesian Coordinates of the DFT computed geometry for 3c**

**In absence of Glucose**

|   |           |          |          |   |           |          |          |
|---|-----------|----------|----------|---|-----------|----------|----------|
| N | -7.61012  | 0.10266  | -0.08981 | C | -7.91507  | -2.31658 | -0.22823 |
| C | -8.28821  | -1.02471 | -0.60745 | C | -8.35106  | 1.24385  | 0.30047  |
| C | -9.34930  | -0.85884 | -1.50150 | C | -9.55033  | 1.10307  | 1.00222  |
| C | -10.02653 | -1.96392 | -1.99633 | C | -10.27677 | 2.22427  | 1.37801  |
| C | -9.64881  | -3.24970 | -1.62362 | C | -9.81342  | 3.50014  | 1.07500  |
| C | -8.58665  | -3.41717 | -0.74138 | C | -8.61610  | 3.64223  | 0.38101  |

|   |           |          |          |   |           |          |          |
|---|-----------|----------|----------|---|-----------|----------|----------|
| C | -7.89196  | 2.52561  | -0.01159 | H | -11.20387 | 2.09882  | 1.92305  |
| C | -6.21216  | 0.07729  | 0.08370  | H | -10.37842 | 4.37283  | 1.37498  |
| C | -5.38399  | -0.54799 | -0.85823 | H | -8.24805  | 4.62933  | 0.13115  |
| C | -4.01395  | -0.57455 | -0.68834 | H | -6.96521  | 2.63799  | -0.55786 |
| C | -3.40077  | 0.03096  | 0.42015  | H | -5.82869  | -1.01118 | -1.72849 |
| C | -1.96260  | 0.03947  | 0.64677  | H | -3.40689  | -1.05855 | -1.44190 |
| C | -1.02618  | -0.59067 | -0.08067 | H | -1.65367  | 0.60869  | 1.51771  |
| C | 0.41554   | -0.54731 | 0.16294  | H | -1.34322  | -1.21679 | -0.90283 |
| C | 1.28169   | -1.49838 | -0.43068 | H | 3.32907   | -2.13952 | -0.59866 |
| C | 2.65635   | -1.40325 | -0.17135 | H | 2.73267   | 1.31342  | 1.83543  |
| C | 3.18958   | -0.41923 | 0.64693  | H | 0.33430   | 1.22543  | 1.38000  |
| C | 2.33564   | 0.52285  | 1.21081  | H | -3.80278  | 1.13424  | 2.21770  |
| C | 0.97606   | 0.46129  | 0.96272  | H | -6.23765  | 1.16809  | 1.93295  |
| C | -4.24171  | 0.66212  | 1.34655  | H | 4.25455   | -0.38080 | 0.83614  |
| C | -5.61699  | 0.68139  | 1.19335  | B | 0.81593   | -2.68378 | -1.34761 |
| H | -9.64031  | 0.13924  | -1.79937 | O | -0.34934  | -3.35614 | -1.11098 |
| H | -10.84666 | -1.81829 | -2.68808 | H | -0.48848  | -4.06906 | -1.74581 |
| H | -10.17508 | -4.10984 | -2.01586 | O | 1.58045   | -3.12198 | -2.40341 |
| H | -8.28633  | -4.41179 | -0.43676 | H | 2.35443   | -2.57703 | -2.57167 |
| H | -7.09765  | -2.45091 | 0.46691  |   |           |          |          |
| H | -9.90877  | 0.11231  | 1.24636  |   |           |          |          |

### In the presence of glucose

|   |         |          |          |   |         |          |          |
|---|---------|----------|----------|---|---------|----------|----------|
| C | 5.69081 | 1.68941  | 0.25107  | C | 4.47584 | 1.54906  | -0.69179 |
| C | 6.52337 | 0.40619  | 0.46898  | H | 6.35977 | 2.47184  | -0.14671 |
| C | 7.02497 | 0.61461  | 1.90593  | H | 5.93888 | 1.73585  | 3.47795  |
| H | 7.36180 | 0.34242  | -0.24627 | O | 4.81365 | 0.17866  | 2.84065  |
| O | 5.72812 | -0.76747 | 0.44893  | H | 5.20499 | -0.67522 | -0.38882 |
| C | 5.74585 | 1.17280  | 2.55170  | H | 7.76851 | 2.40870  | 1.76304  |
| O | 8.10113 | 1.52467  | 1.97992  | H | 4.82824 | -0.43513 | 2.07614  |
| H | 7.34921 | -0.33005 | 2.36539  | C | 3.11671 | 1.31370  | -0.01747 |
| O | 5.28607 | 2.10941  | 1.57703  | O | 4.60849 | 0.43594  | -1.55594 |

|   |          |          |          |   |          |          |          |
|---|----------|----------|----------|---|----------|----------|----------|
| H | 4.40083  | 2.47881  | -1.29308 | C | 3.31812  | -4.51755 | -1.74615 |
| H | 3.22844  | 0.63077  | 0.84659  | C | 2.13696  | -3.86102 | -1.41339 |
| O | 2.34189  | 0.75280  | -1.04135 | C | -2.87092 | -2.27725 | -0.43983 |
| H | 2.66524  | 2.24869  | 0.35714  | C | -4.05709 | -1.61321 | -0.13407 |
| N | -5.26454 | 0.46581  | 0.35870  | H | -6.34083 | 2.69005  | 1.40255  |
| C | -5.59187 | 1.64903  | -0.34119 | H | -6.90638 | 4.76184  | 0.16599  |
| C | -6.15481 | 2.75072  | 0.32871  | H | -6.45900 | 4.92926  | -2.28857 |
| C | -6.47076 | 3.91529  | -0.37198 | H | -5.44516 | 2.98081  | -3.48459 |
| C | -6.21713 | 4.01270  | -1.74487 | H | -4.90842 | 0.89786  | -2.25123 |
| C | -5.64681 | 2.92261  | -2.41146 | H | -7.94441 | 0.49234  | 0.36311  |
| C | -5.34325 | 1.74784  | -1.72230 | H | -9.41497 | -0.36908 | 2.16035  |
| C | -6.10524 | -0.02821 | 1.37936  | H | -8.42831 | -1.41601 | 4.20679  |
| C | -7.50540 | 0.04851  | 1.25841  | H | -5.94158 | -1.57037 | 4.42431  |
| C | -8.32949 | -0.43894 | 2.27333  | H | -4.47126 | -0.67940 | 2.64004  |
| C | -7.77982 | -1.02878 | 3.41709  | H | -2.84750 | 1.56661  | 0.02881  |
| C | -6.38827 | -1.11721 | 3.53498  | H | -0.76045 | 0.39549  | -0.53843 |
| C | -5.55558 | -0.61695 | 2.53332  | H | -0.56718 | -3.41017 | -1.03217 |
| C | -4.06461 | -0.22143 | 0.03933  | H | 0.89212  | -0.68937 | -1.03195 |
| C | -2.85659 | 0.48348  | -0.11017 | H | 5.23528  | -1.79754 | -2.44496 |
| C | -1.68071 | -0.18262 | -0.43167 | H | 3.36992  | -5.60944 | -1.70621 |
| C | -1.65299 | -1.58563 | -0.60303 | H | 1.26968  | -4.45229 | -1.10804 |
| C | -0.43408 | -2.32691 | -0.93435 | H | -2.88533 | -3.36325 | -0.57063 |
| C | 0.78398  | -1.77052 | -1.12559 | H | -4.98773 | -2.17428 | -0.02569 |
| C | 2.04217  | -2.45103 | -1.45204 | H | 5.37325  | -4.26728 | -2.39213 |
| C | 3.17667  | -1.67168 | -1.81630 | B | 3.20665  | -0.03601 | -1.96723 |
| C | 4.35128  | -2.37239 | -2.15379 | O | 2.88869  | 0.27199  | -3.34557 |
| C | 4.43761  | -3.76618 | -2.12530 | H | 2.80066  | 1.23078  | -3.43329 |
